# Supplementary material for: Anticancer Profiling for Coumarins and Related O-Naphthoquinones from Mansonia gagei against Solid Tumor Cells In Vitro
Source: PubMed Central journal article supplement (PMC6102575; doi:10.3390/molecules23051020), 2018-04-26
Supplement: molecules-23-01020-s001.pdf [file molecules-23-01020-s001.pdf]

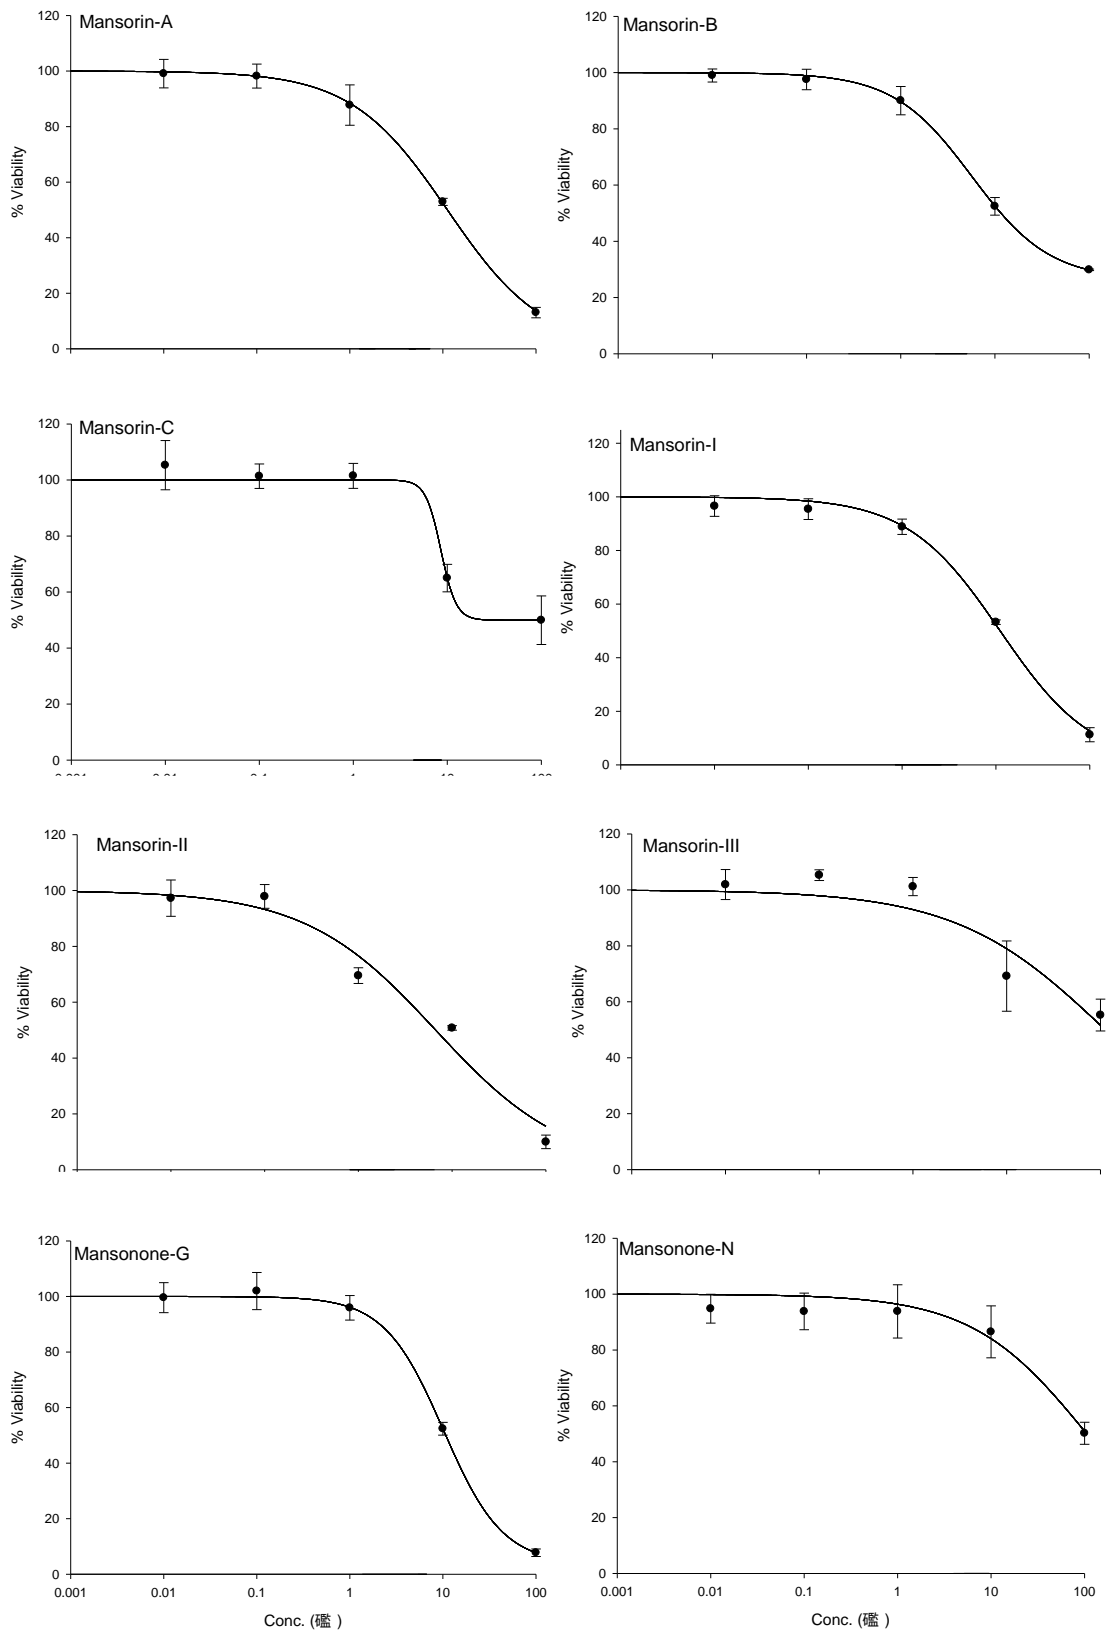

**Supp. Fig. 1.** Dose response curves of different naturally occurring coumarins and *O*-naphthoquinones against HCT-116 cells.

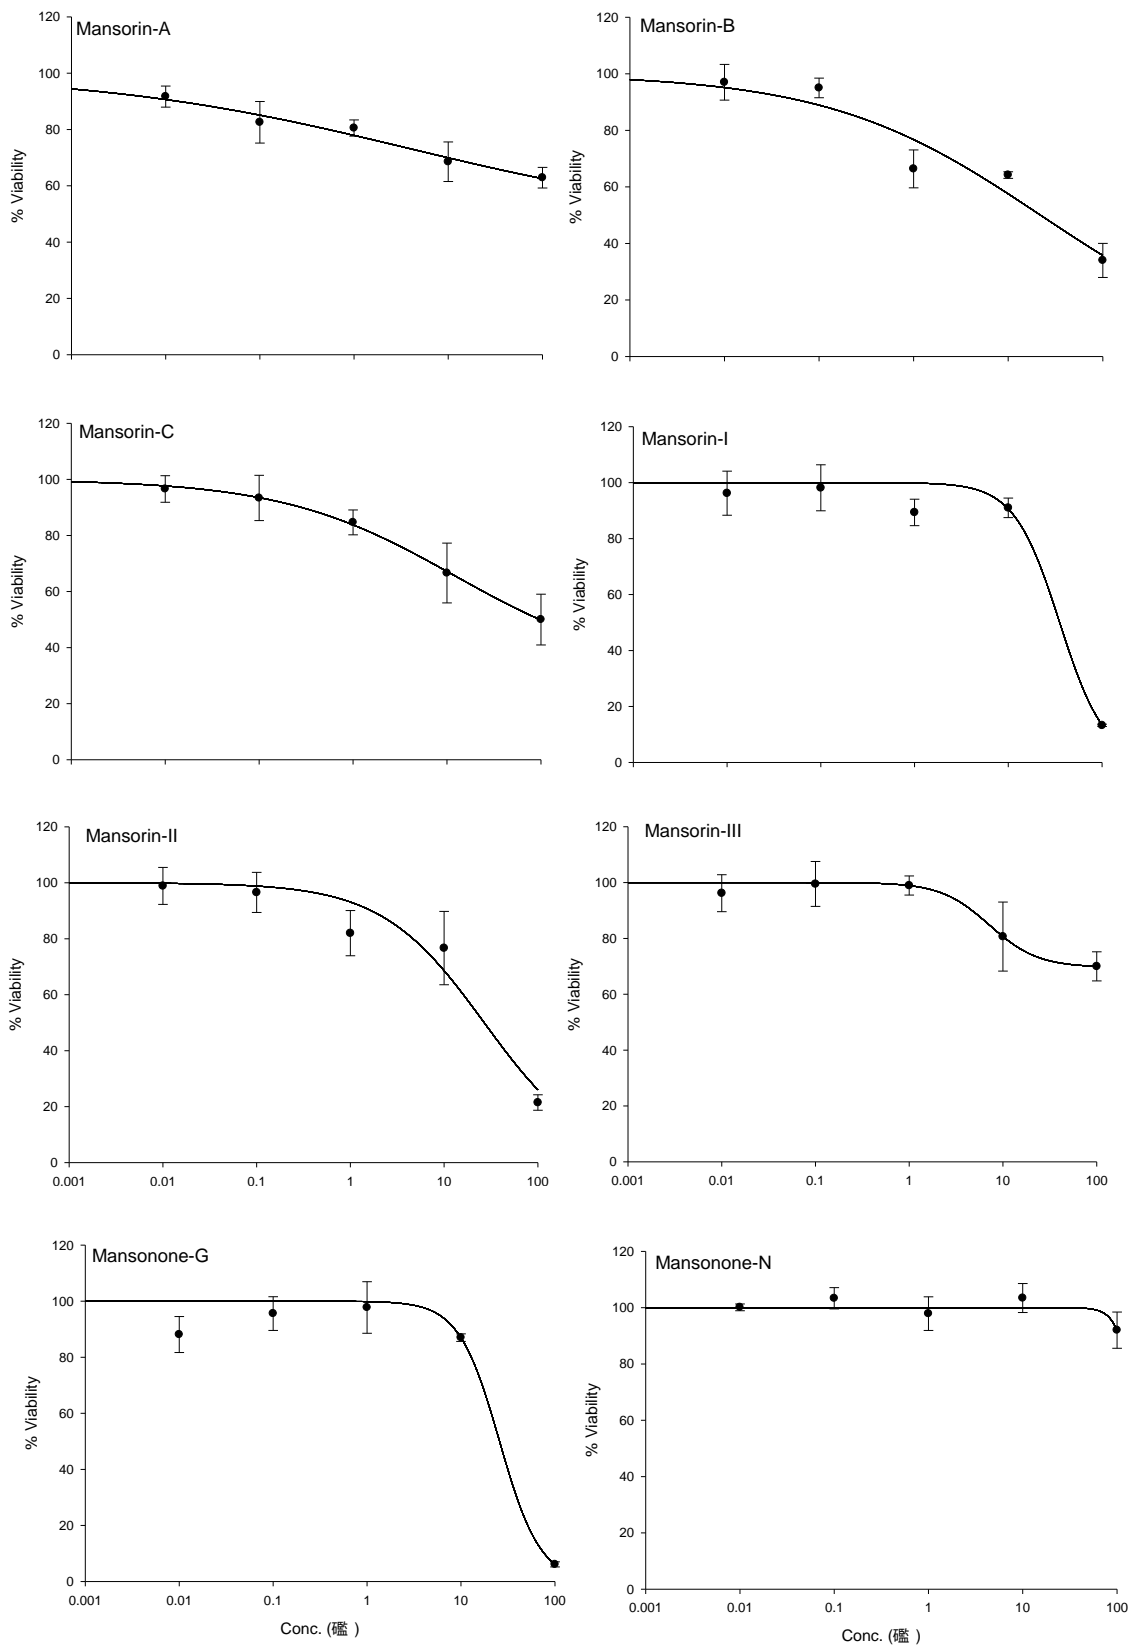

**Supp. Fig. 2.** Dose response curves of different naturally occurring coumarins and *O*-naphthoquinones against HepG2 cells.

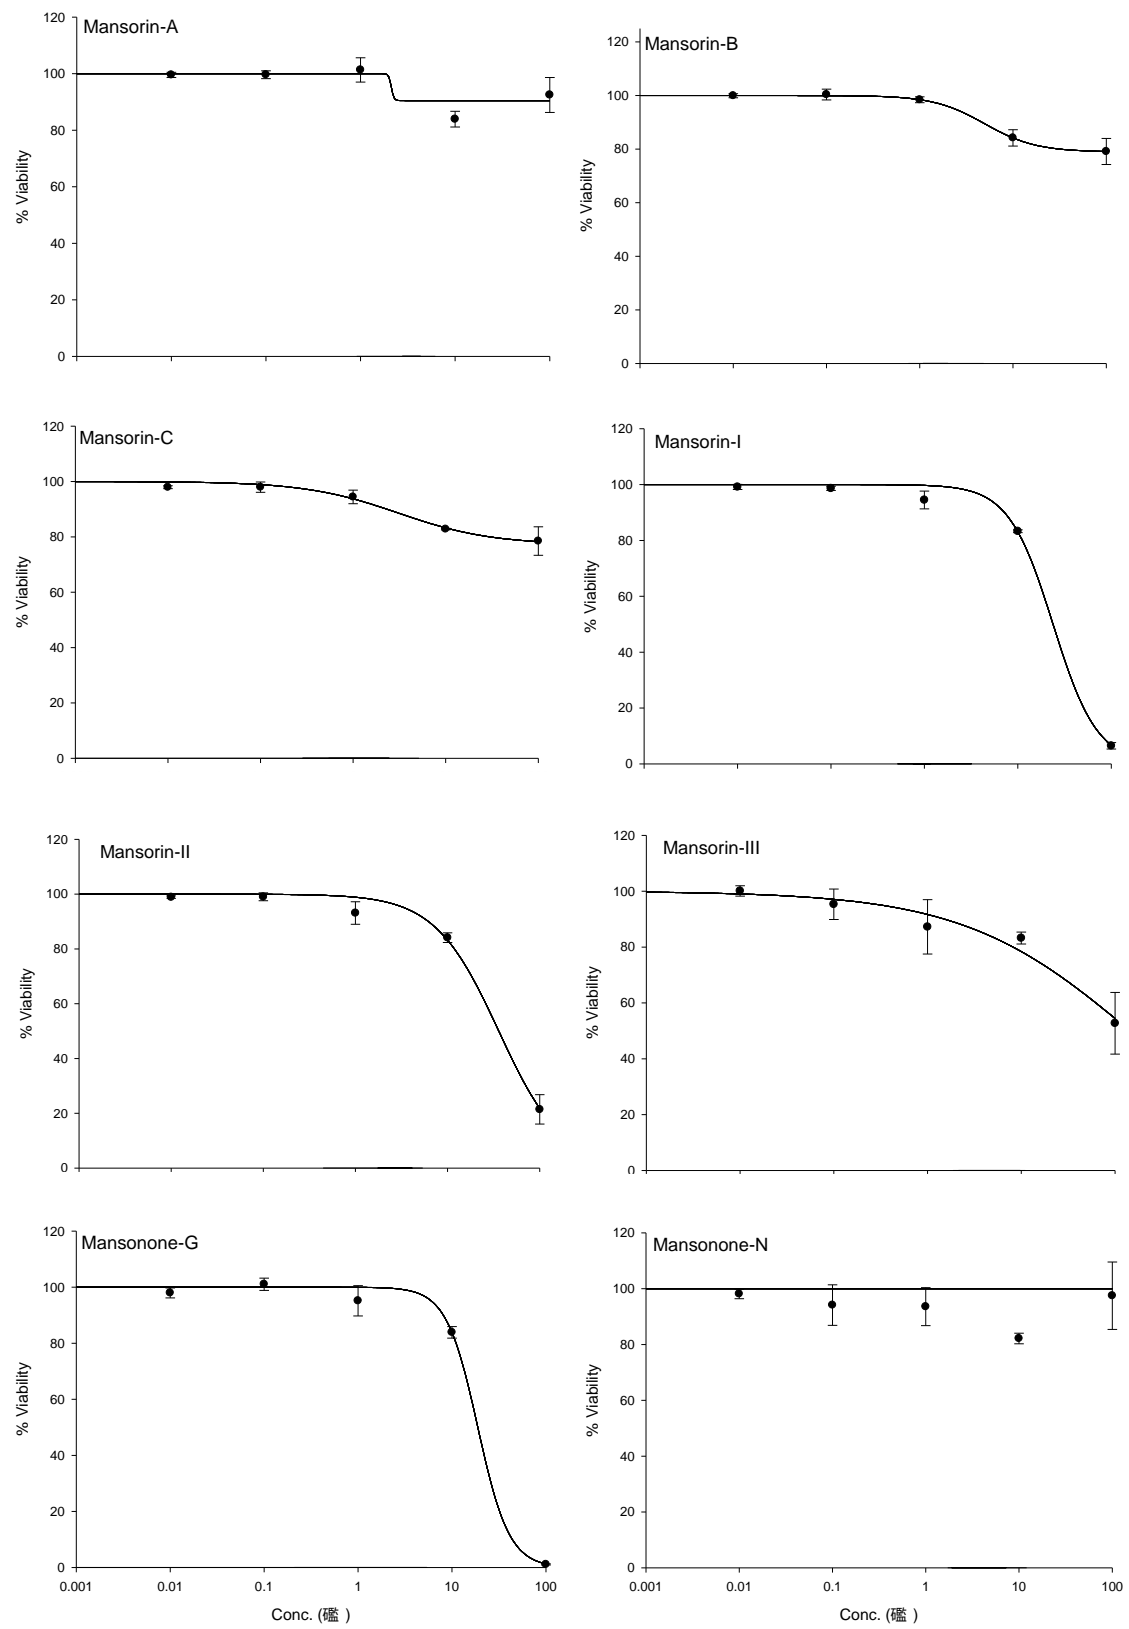

**Supp. Fig. 3.** Dose response curves of different naturally occurring coumarins and *O*-naphthoquinones against MCF-7 cells.

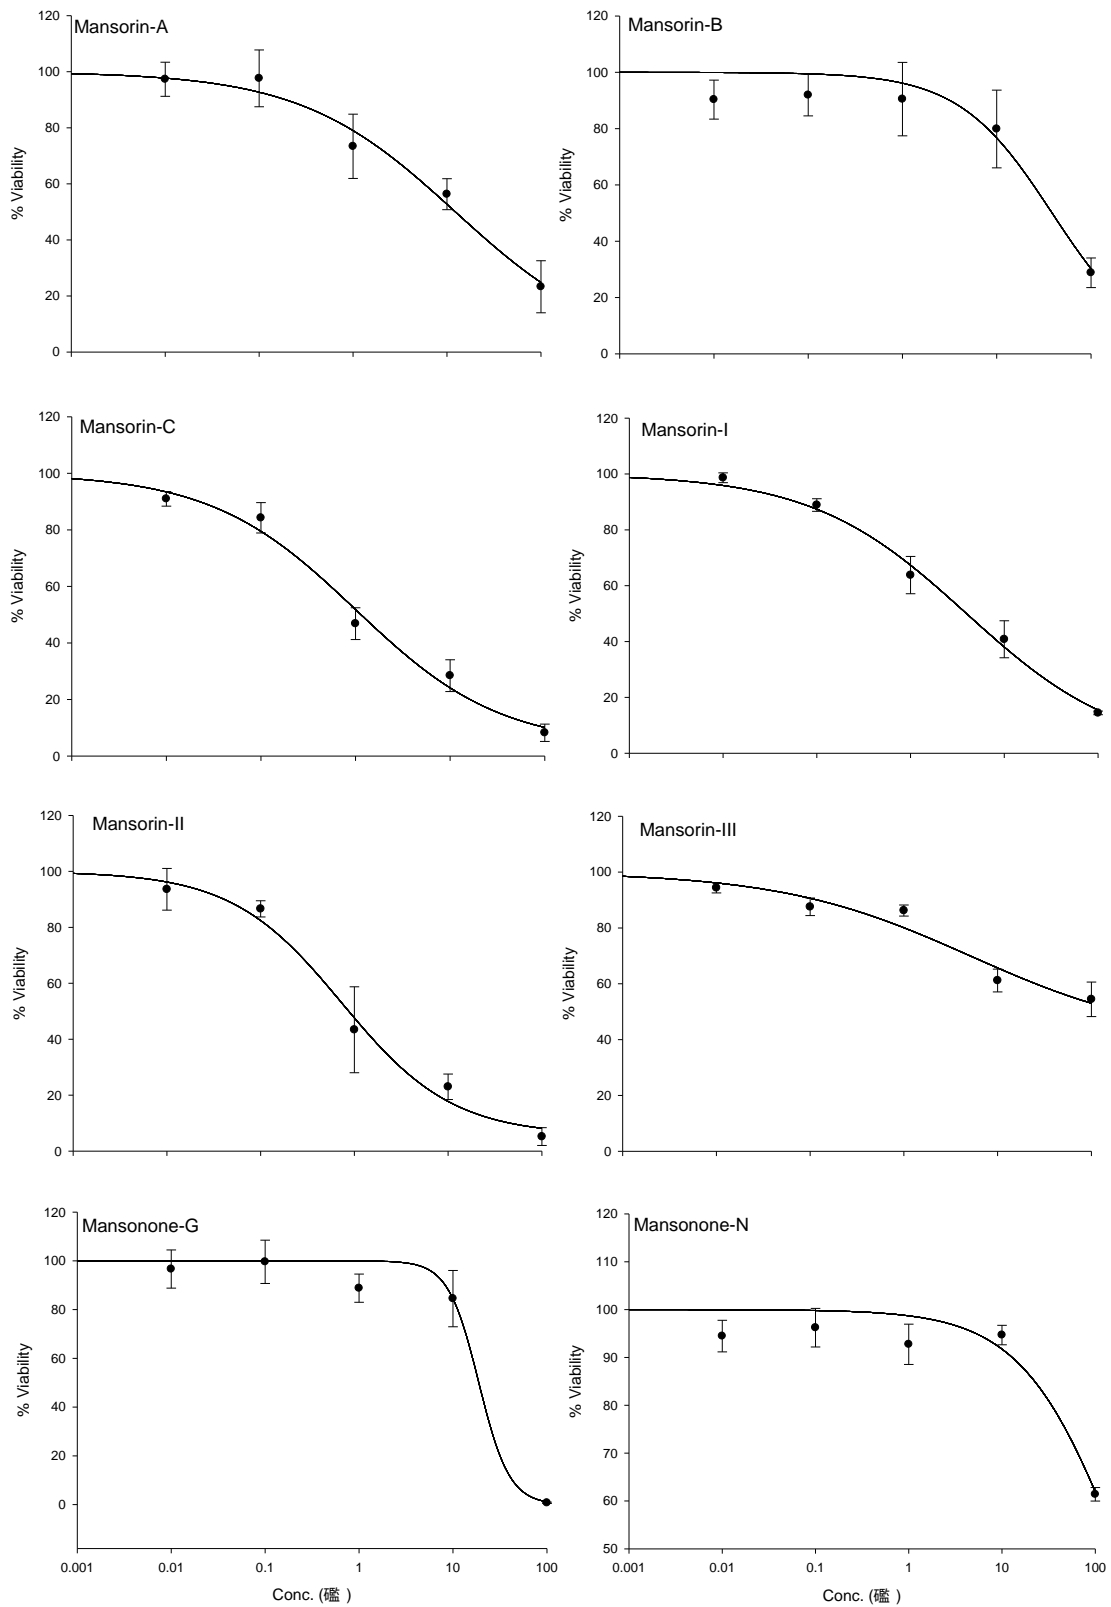

**Supp. Fig. 4.** Dose response curves of different naturally occurring coumarins and *O*-naphthoquinones against HeLa cells.

Dr. Hossam  
 Sample : MAN-A CDCL3

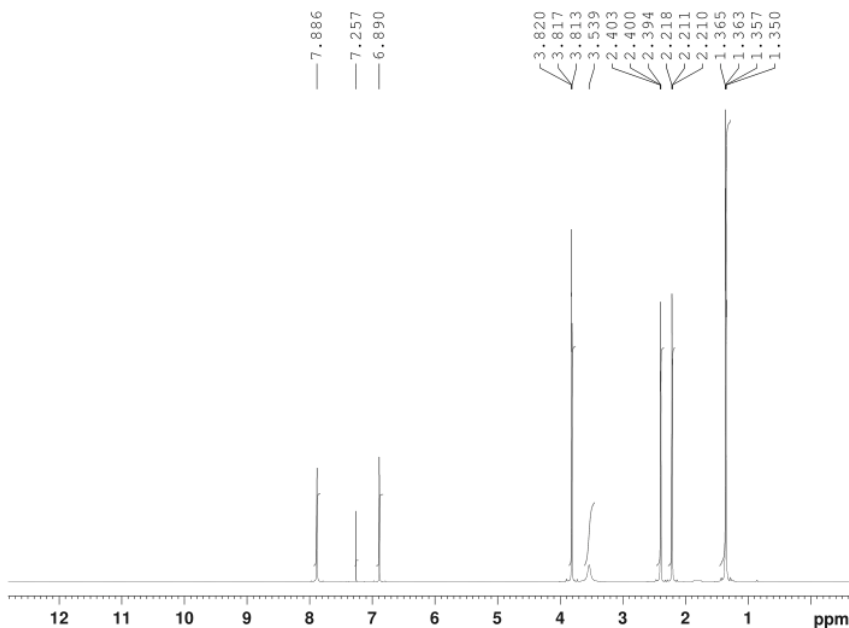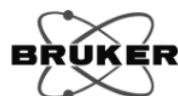

Current Data Parameters  
 NAME HOSSAM MAN-A 07-01-2016  
 EXPNO 40  
 PROCNO 1

F2 - Acquisition Parameters  
 Date\_ 20160107  
 Time 11.53  
 INSTRUM spect  
 PROBRD 5 mm CPQCI 1H-  
 PULPROG zg30  
 TD 65536  
 SOLVENT CDCl3  
 NS 32  
 DS 2  
 SWH 17006.803 Hz  
 FIDRES 0.293003 Hz  
 AQ 1.9267984 sec  
 RG 4.74  
 DM 29.400 usec  
 DE 10.00 usec  
 TE 298.2 K  
 D1 1.00000000 sec  
 TDO 1

===== CHANNEL f1 =====  
 SF01 850.1552500 MHz  
 NUC1 1H  
 P1 1.00 usec  
 PL1 15.30000019 W

F2 - Processing parameters  
 S1 65536  
 SF 850.1500240 MHz  
 NDM 3H  
 SSB 0  
 LB 0.30 Hz  
 GB 0  
 PC 2.00

Dr. Hossam  
 Sample : MAN-A CDCL3

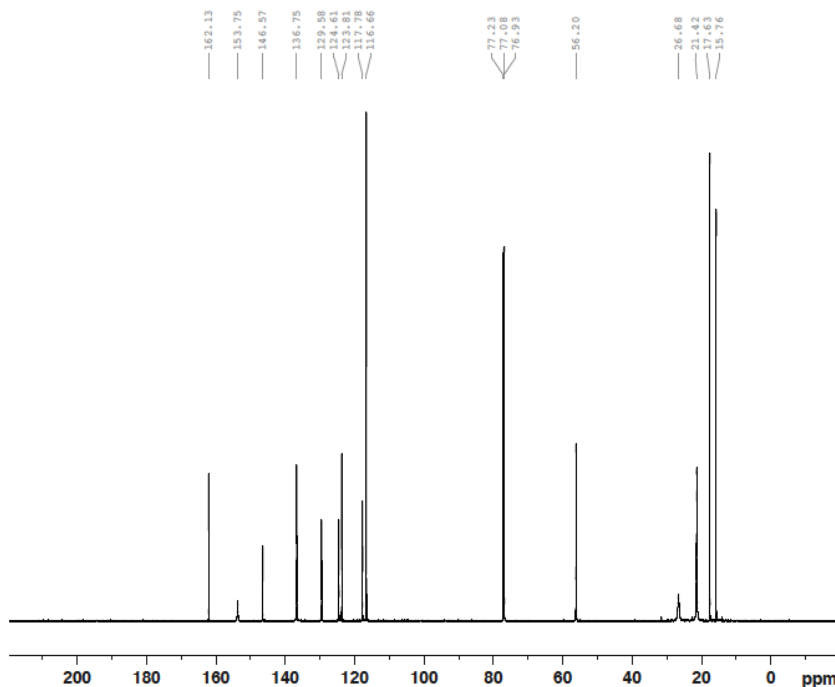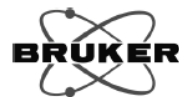

Current Data Parameters  
 NAME HOSSAM MAN-A 07-01-2016  
 EXPNO 42  
 PROCNO 1

F1 - Acquisition Parameters  
 Date\_ 20160107  
 Time 12.15  
 INSTRUM spect  
 PROBRD 5 mm CPQCI 1H-  
 PULPROG zgpg30  
 TD 65536  
 SOLVENT CDCl3  
 NS 484  
 DS 4  
 SWH 51020.406 Hz  
 FIDRES 0.778810 Hz  
 AQ 0.6422528 sec  
 RG 186.93  
 DM 9.600 usec  
 DE 18.00 usec  
 TE 298.2 K  
 D1 2.00000000 sec  
 D11 0.03000000 sec  
 TDO 1

===== CHANNEL f1 =====  
 SF01 213.7917436 MHz  
 NUC1 13C  
 P1 12.00 usec  
 PL1 130.00000000 W

===== CHANNEL f2 =====  
 SF02 850.1524006 MHz  
 NUC2 1H  
 CPDPRG2 waltz16  
 SF03 80.10 usec  
 PL12 13.80000019 W  
 PL13 0.13800000 W  
 PL13 0.08852000 W

F1 - Processing parameters  
 S1 65536  
 SF 213.7703876 MHz  
 NDM 3H  
 SSB 0  
 LB 1.50 Hz  
 GB 0  
 PC 2.00

Supp. Fig 5. <sup>1</sup>H and <sup>13</sup>C NMR charts of compound 1

Dr.Hossam  
 Sample : MAN-B CDCL3

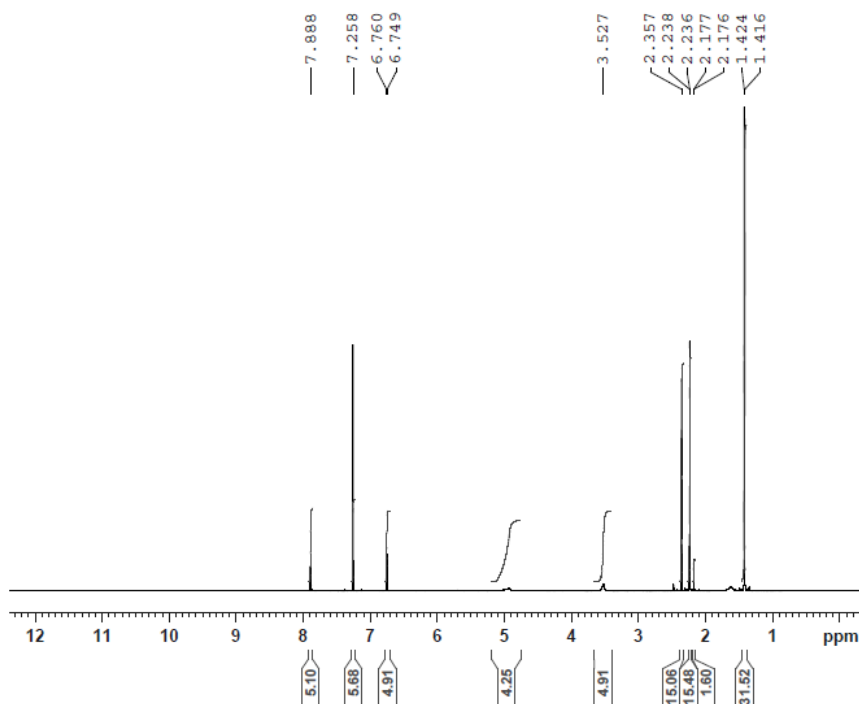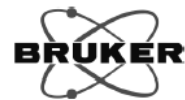

Current Data Parameters  
 NAME HOSSAM MAN-B 07-01-2016  
 EXPNO 30  
 PROCNO 1

F2 - Acquisition Parameters  
 Date\_ 20160107  
 Time 11.06  
 INSTRUM spect  
 PROBEH 5 mm CPQCI 1H  
 PULPROG zg30  
 TD 6536  
 SOLVENT CDCl3  
 NS 32  
 DS 2  
 SWH 17006.803 Hz  
 FIDRES 0.219503 Hz  
 AQ 1.9267584 sec  
 RG 12.46  
 DW 19.400 usec  
 DE 10.00 usec  
 TE 298.0 K  
 D1 1.00000000 sec  
 TDO 1

----- CHANNEL f1 -----  
 SFO1 850.1552500 MHz  
 NUCL1 1H  
 P1 8.00 usec  
 PLW1 15.30000019 W

F2 - Processing parameters  
 SI 6536  
 SF 850.1500240 MHz  
 WMW EM  
 SSB 0  
 LB 0.30 Hz  
 GB 0  
 PC 2.00

Dr.Hossam  
 Sample : MAN-B CDCL3

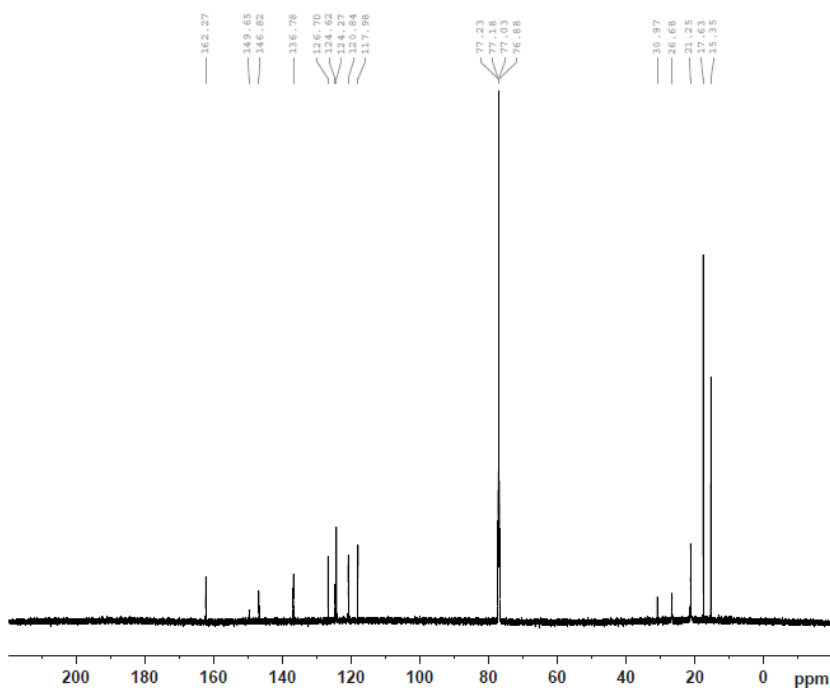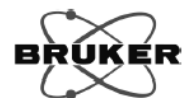

Current Data Parameters  
 NAME HOSSAM MAN-B 07-01-2016  
 EXPNO 32  
 PROCNO 1

F2 - Acquisition Parameters  
 Date\_ 20160107  
 Time 11.19  
 INSTRUM spect  
 PROBEH 5 mm CPQCI 1H  
 PULPROG zgpg30  
 TD 6536  
 SOLVENT CDCl3  
 NS 883  
 DS 4  
 SWH 51020.406 Hz  
 FIDRES 0.778510 Hz  
 AQ 0.64232528 sec  
 RG 186.93  
 DW 9.800 usec  
 DE 18.00 usec  
 TE 298.0 K  
 D1 2.00000000 sec  
 D11 0.03000000 sec  
 TDO 1

----- CHANNEL f1 -----  
 SFO1 213.7917636 MHz  
 NUCL1 13C  
 P1 12.00 usec  
 PLW1 130.00000000 W

----- CHANNEL f2 -----  
 SFO2 850.1534006 MHz  
 NUCL2 1H  
 CPDPRG2 waltz16  
 PCPD2 80.00 usec  
 PLW2 13.80000019 W  
 PLW12 0.13800000 W  
 PLW13 0.08832000 W

F2 - Processing parameters  
 SI 32768  
 SF 213.7703875 MHz  
 WMW EM  
 SSB 0  
 LB 1.00 Hz  
 GB 0  
 PC 2.00

Supp. Fig 6. <sup>1</sup>H and <sup>13</sup>C NMR charts of compound 2

Dr.Hossam  
Sample : M-2 CDCL3

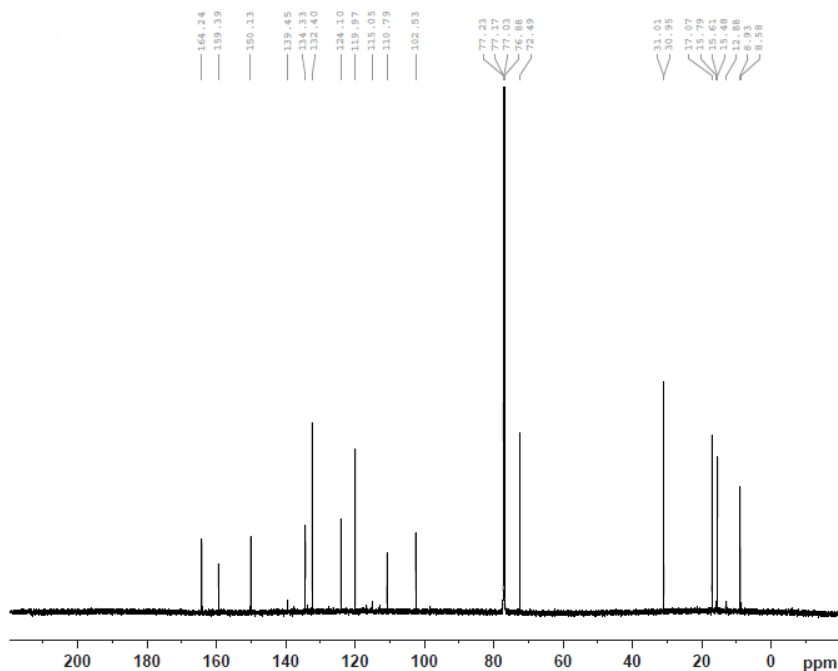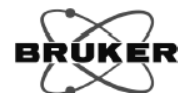

Current Data Parameters  
NAME HOSSAM M-2 07-01-2016  
EXPRO 52  
PROCNO 1

F2 - Acquisition Parameters  
Date\_ 20160107  
Time 13.01  
INSTRUM spect  
PROBHD 5 mm CDQCI 1H-  
PULPROG zgpg30  
TD 65536  
SOLVENT CDCL3  
NS 870  
DS 4  
SWH 51020.406 Hz  
FIDRES 0.778510 Hz  
AQ 0.6422528 sec  
RG 186.93  
EW 9.800 usec  
DE 18.00 usec  
TE 298.0 K  
D1 2.00000000 sec  
D11 0.03000000 sec  
TD0 1

----- CHANNEL f1 -----  
SFO1 213.770375 MHz  
NUC1 13C  
P1 12.00 usec  
PLW1 130.0000000 W

----- CHANNEL f2 -----  
SFO2 850.1534006 MHz  
NUC2 1H  
CPDPRG2 waltz16  
PCPD2 80.00 usec  
PLW2 13.80000019 W  
PLW12 0.13800000 W  
PLW13 0.08832000 W

F2 - Processing parameters  
SI 32768  
SF 213.770375 MHz  
WDW EM  
SSB 0 1.50 Hz  
LB 0  
GB 0  
PC 2.00

Dr.Hossam  
Sample : M-2 CDCL3

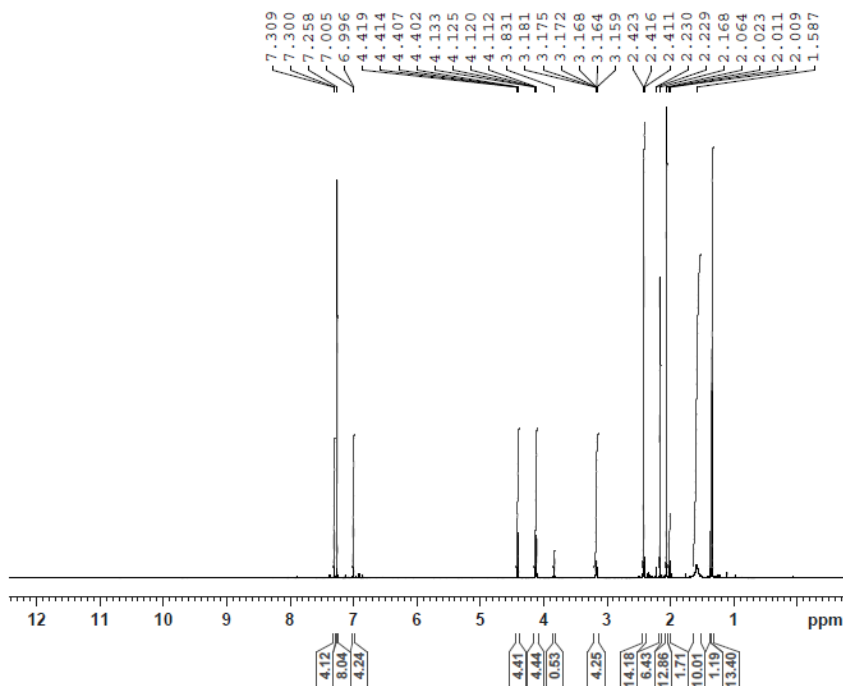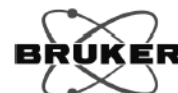

Current Data Parameters  
NAME HOSSAM M-2 07-01-2016  
EXPRO 50  
PROCNO 1

F2 - Acquisition Parameters  
Date\_ 20160107  
Time 12.21  
INSTRUM spect  
PROBHD 5 mm CDQCI 1H-  
PULPROG zg30  
TD 65536  
SOLVENT CDCL3  
NS 32  
DS 2  
SWH 17006.803 Hz  
FIDRES 0.259503 Hz  
AQ 1.9267584 sec  
RG 11.27  
EW 29.400 usec  
DE 10.00 usec  
TE 298.0 K  
D1 1.00000000 sec  
TD0 1

----- CHANNEL f1 -----  
SFO1 850.1552500 MHz  
NUC1 1H  
P1 8.00 usec  
PLW1 15.30000019 W

F2 - Processing parameters  
SI 65536  
SF 850.1500240 MHz  
WDW EM  
SSB 0 0.30 Hz  
LB 0  
GB 0  
PC 2.00

Supp. Fig 7. <sup>1</sup>H and <sup>13</sup>C NMR charts of compound 3

Dr.Hossam  
Sample : M-7 CDCL3

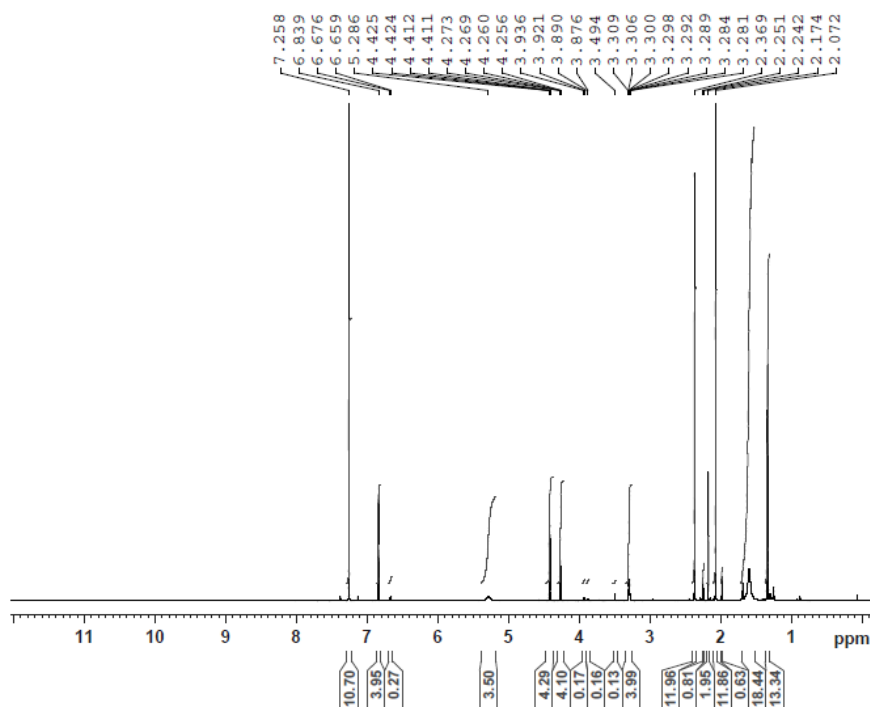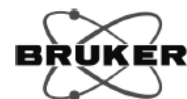

Current Data Parameters  
NAME HOSSAM M-7 07-01-2016  
EXPNO 60  
PROCNO 1

F2 - Acquisition Parameters  
Date\_ 20160107  
Time 13.07  
INSTRUM spect  
PROBHD 5 mm CPQCI 1H-  
PULPROG zg30  
TD 65536  
SOLVENT CDCl3  
NS 32  
DS 2  
SWH 17006.803 Hz  
FIDRES 0.259503 Hz  
AQ 1.9267584 sec  
RG 11.37  
LW 29.400 usec  
DE 10.00 usec  
TE 298.0 K  
D1 1.00000000 sec  
TDO 1

----- CHANNEL f1 -----  
SFO1 850.1552500 MHz  
NUC1 1H  
P1 8.00 usec  
PLW1 15.30000019 W

F2 - Processing parameters  
SI 65536  
SF 850.1500040 MHz  
WDW EM  
SBB 0  
LB 0.30 Hz  
GB 0  
PC 2.00

Dr.Hossam  
Sample : M-7 CDCL3

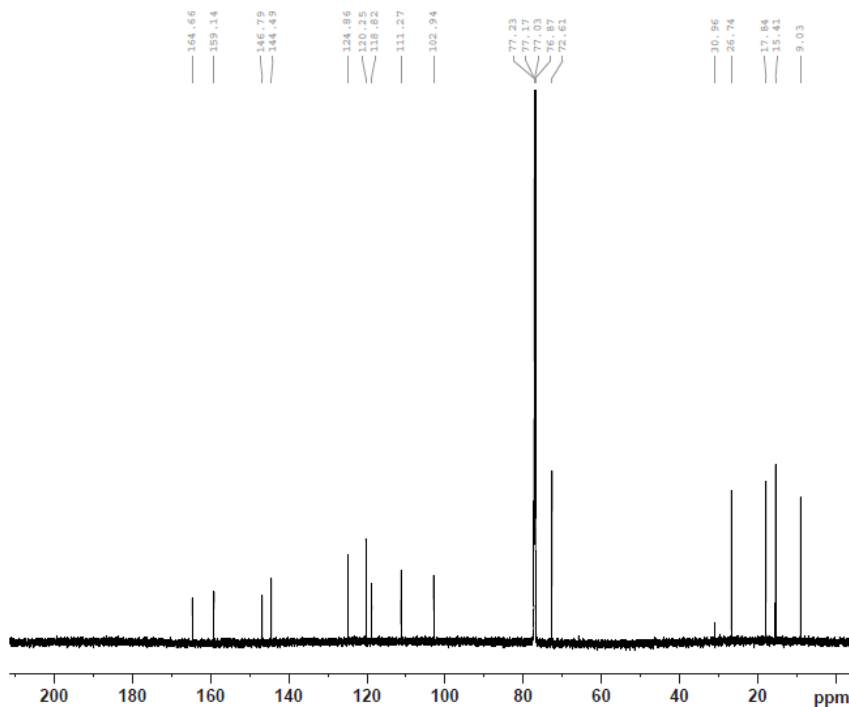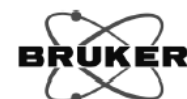

Current Data Parameters  
NAME HOSSAM M-7 07-01-2016  
EXPNO 62  
PROCNO 1

F2 - Acquisition Parameters  
Date\_ 20160107  
Time 13.12  
INSTRUM spect  
PROBHD 5 mm CPQCI 1H-  
PULPROG zgpg30  
TD 65536  
SOLVENT CDCl3  
NS 4  
DS 4  
SWH 51020.406 Hz  
FIDRES 0.778510 Hz  
AQ 0.6422528 sec  
RG 186.93  
LW 9.800 usec  
DE 18.00 usec  
TE 298.0 K  
D1 2.00000000 sec  
D11 0.03000000 sec  
TDO 1

----- CHANNEL f1 -----  
SFO1 213.7917636 MHz  
NUC1 13C  
P1 12.00 usec  
PLW1 130.00000000 W

----- CHANNEL f2 -----  
SFO2 850.1534006 MHz  
NUC2 1H  
PCPDPRG2 waltz16  
PCPD2 80.00 usec  
PLW2 13.80000019 W  
PLW12 0.13800000 W  
PLW13 0.08832000 W

F2 - Processing parameters  
SI 32768  
SF 213.7703876 MHz  
WDW EM  
SBB 0  
LB 1.50 Hz  
GB 0  
PC 2.00

Supp. Fig 8. <sup>1</sup>H and <sup>13</sup>C NMR charts of compound 4



Dr. Hossam  
 Sample : MAN-G CDCL3

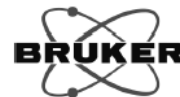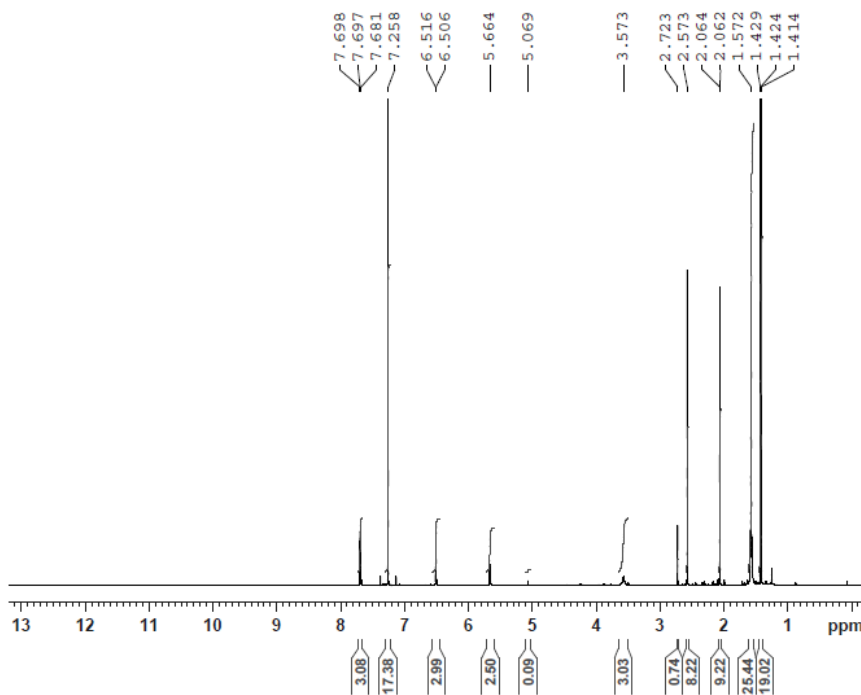

Current Data Parameters  
 NAME HOSAM MAN-G 07-01-2016  
 EXPNO 20  
 PROCNO 1

F2 - Acquisition Parameters  
 Date 20160107  
 Time 9.27  
 INSTRUM spect  
 PROBEHD 5 mm CPQCI 1H-  
 PULPROG zg30  
 TD 65536  
 SOLVENT CDCL3  
 NS 32  
 DS 2  
 SWH 17006.803 Hz  
 FIDRES 0.258503 Hz  
 AQ 1.3227568 sec  
 RG 12.46  
 DM 29.400 usec  
 DE 10.00 usec  
 TE 298.0 K  
 D1 1.0000000 sec  
 TDO 1

----- CHANNEL f1 -----  
 SFO1 850.1552500 MHz  
 NUCL1 1H  
 P1 8.00 usec  
 PLW1 15.30000019 W

F2 - Processing parameters  
 SI 65536  
 SF 850.1500240 MHz  
 MW EM  
 GB 0  
 LB 0.30 Hz  
 CB 0  
 PC 2.00

Dr. Hossam  
 Sample : MAN-G CDCL3

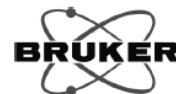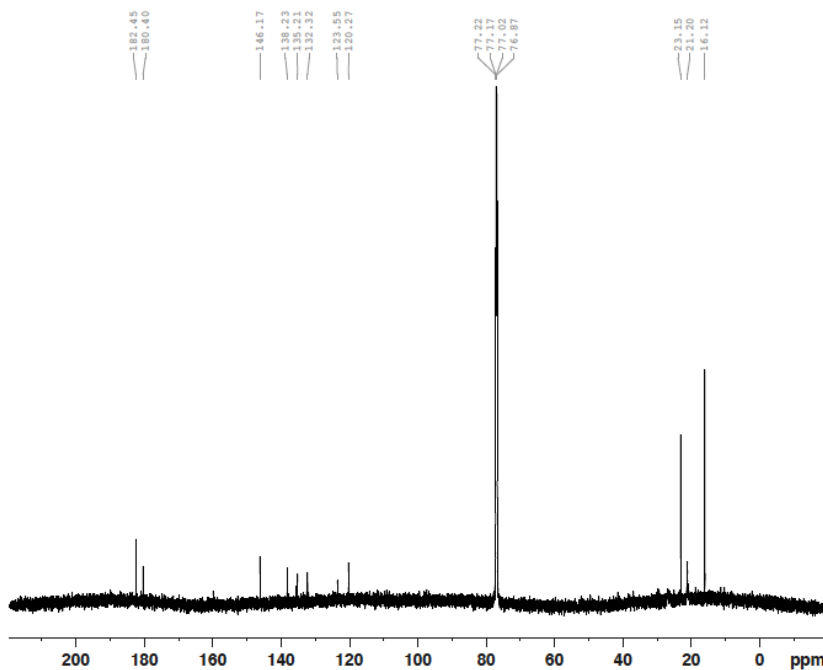

Current Data Parameters  
 NAME HOSAM MAN-G 07-01-2016  
 EXPNO 21  
 PROCNO 1

F1 - Acquisition Parameters  
 Date 20160107  
 Time 9.45  
 INSTRUM spect  
 PROBEHD 5 mm CPQCI 1H-  
 PULPROG zgpg30  
 TD 65536  
 SOLVENT CDCL3  
 NS 2048  
 DS 4  
 SWH 51020.468 Hz  
 FIDRES 0.778510 Hz  
 AQ 0.6422528 sec  
 RG 156.33  
 DM 9.800 usec  
 DE 10.00 usec  
 TE 298.0 K  
 D1 2.00000000 sec  
 D11 0.03000000 sec  
 TDO 1

----- CHANNEL f1 -----  
 SFO1 213.7917636 MHz  
 NUCL1 13C  
 P1 12.00 usec  
 PLW1 130.00000000 W

----- CHANNEL f2 -----  
 SFO2 850.1554006 MHz  
 NUCL2 1H  
 CPDPRG[2] waltz16  
 PCPD2 80.00 usec  
 PLW2 13.80000019 W  
 PLW12 0.13800000 W  
 PLW13 0.08832000 W

F2 - Processing parameters  
 SI 32768  
 SF 213.7703876 MHz  
 MW EM  
 GB 0  
 LB 1.50 Hz  
 CB 0  
 PC 2.00

Supp. Fig 9. <sup>1</sup>H and <sup>13</sup>C NMR charts of compound 5

Dr. Hossam  
 Sample : MAN-N CDCL3

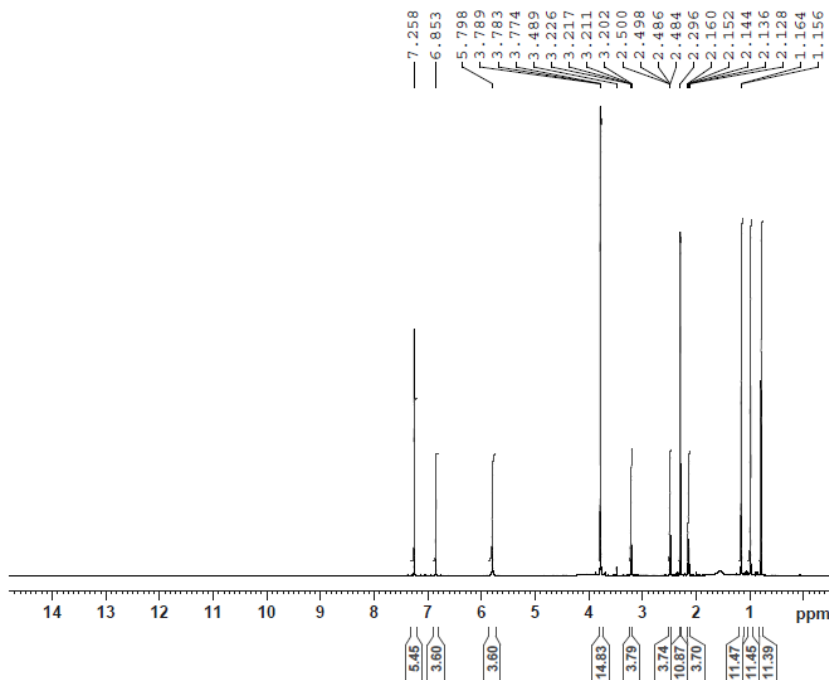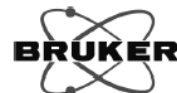

Current Data Parameters 07-01-2016  
 NAME HOSSAM MAN-N  
 EXPRO 10  
 PROCNO 1

F2 - Acquisition Parameters  
 Date\_ 20160107  
 Time 9.06  
 INSTRUM spect  
 PROBHD 5 mm CPQCI 1H-  
 PULPROG zg30  
 TD 65536  
 SOLVENT CDCl3  
 NS 32  
 DS 2  
 SWH 17006.803 Hz  
 FIDRES 0.269603 Hz  
 AQ 1.9247684 sec  
 RG 9.04  
 DW 29.400 usec  
 DE 10.00 usec  
 TE 298.0 K  
 D1 1.00000000 sec  
 TDO 1

----- CHANNEL f1 -----  
 SFO1 850.152500 MHz  
 NUC1 1H  
 P1 8.00 usec  
 PLM1 15.30000010 W

F2 - Processing parameters  
 SI 65536  
 SF 850.1500240 MHz  
 MW 6M  
 SSB 0  
 LB 0.30 Hz  
 GB 0  
 PC 2.00

Dr. Hossam  
 Sample : MAN-N CDCL3

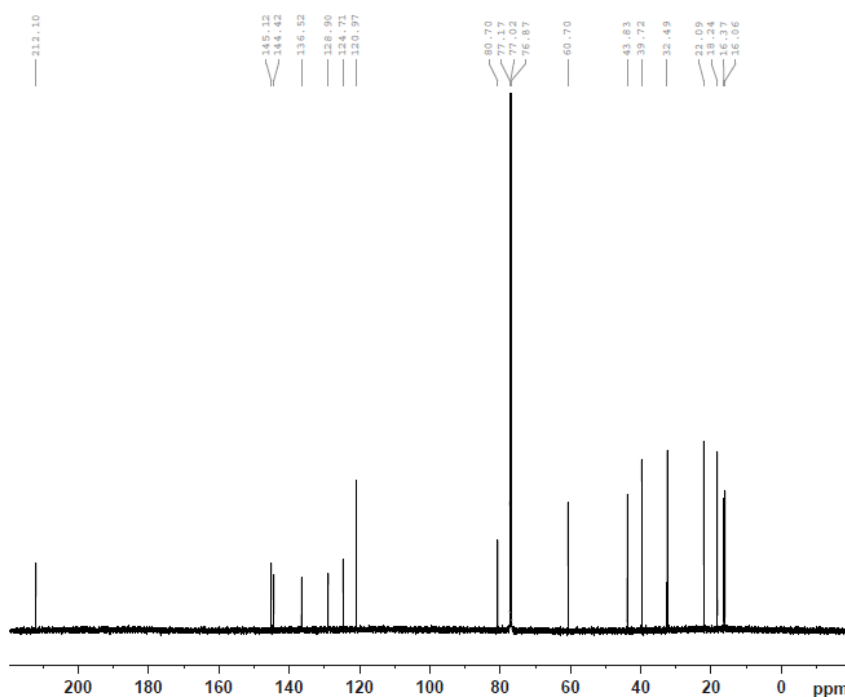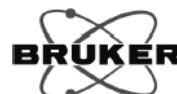

Current Data Parameters 07-01-2016  
 NAME HOSSAM MAN-N  
 EXPRO 11  
 PROCNO 1

F2 - Acquisition Parameters  
 Date\_ 20160107  
 Time 9.22  
 INSTRUM spect  
 PROBHD 5 mm CPQCI 1H-  
 PULPROG zgpg30  
 TD 65536  
 SOLVENT CDCl3  
 NS 313  
 DS 4  
 SWH 51020.406 Hz  
 FIDRES 0.778510 Hz  
 AQ 0.6422528 sec  
 RG 186.90  
 DW 9.800 usec  
 DE 18.00 usec  
 TE 298.0 K  
 D1 2.00000000 sec  
 D11 0.03000000 sec  
 TDO 1

----- CHANNEL f1 -----  
 SFO1 213.7017636 MHz  
 NUC1 13C  
 P1 12.00 usec  
 PLM1 130.00000000 W

----- CHANNEL f2 -----  
 SFO2 850.1534006 MHz  
 NUC2 1H  
 CDPRG2 waltz16  
 DCPR2 80.00 usec  
 PLM2 13.80000010 W  
 PLM12 0.13800000 W  
 PLM13 0.08832000 W

F2 - Processing parameters  
 SI 32768  
 SF 213.7703875 MHz  
 MW 8M  
 SSB 0  
 LB 1.50 Hz  
 GB 0  
 PC 2.00

Supp. Fig 10. <sup>1</sup>H and <sup>13</sup>C NMR charts of compound 6

Dr.Hossam  
Sample : M-4 CDCL3

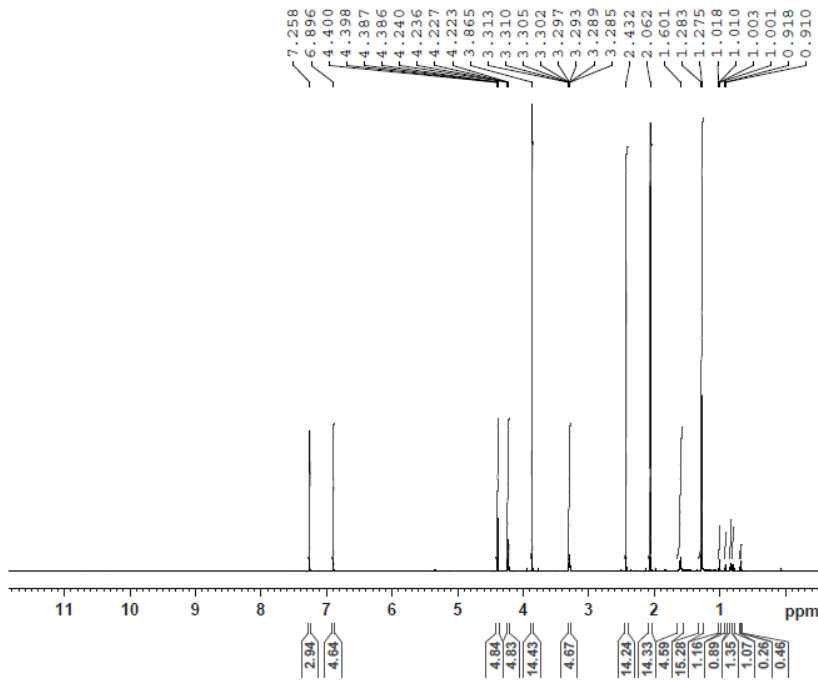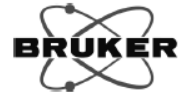

Current Data Parameters  
NAME: HOSSAM W-4 02-11-2015  
EXPNO: 100  
PROCNO: 1

F2 - Acquisition Parameters  
Date\_: 20111102  
Time: 10.51  
INSTRUM: spect  
PROBHD: 5 mm CPQCI 1H-  
PULPROG: zg30  
TD: 65536  
SOLVENT: CDCL3  
NS: 32  
DS: 2  
SWH: 17006.803 Hz  
FIDRES: 0.29293 Hz  
AQ: 1.9267584 sec  
RG: 10.55  
DW: 29.400 usec  
DE: 10.00 usec  
TE: 298.0 K  
D1: 1.00000000 sec  
TD0: 1

----- CHANNEL f1 -----  
SFO1: 850.1562500 MHz  
NUC1: 1H  
P1: 8.00 usec  
PLW1: 15.30000019 W

F2 - Processing parameters  
SI: 65536  
SF: 850.1500240 MHz  
WDW: EM  
SSB: 0  
LB: 0.30 Hz  
GB: 0  
PC: 2.00

Dr.Hossam  
Sample : M-4 CDCL3

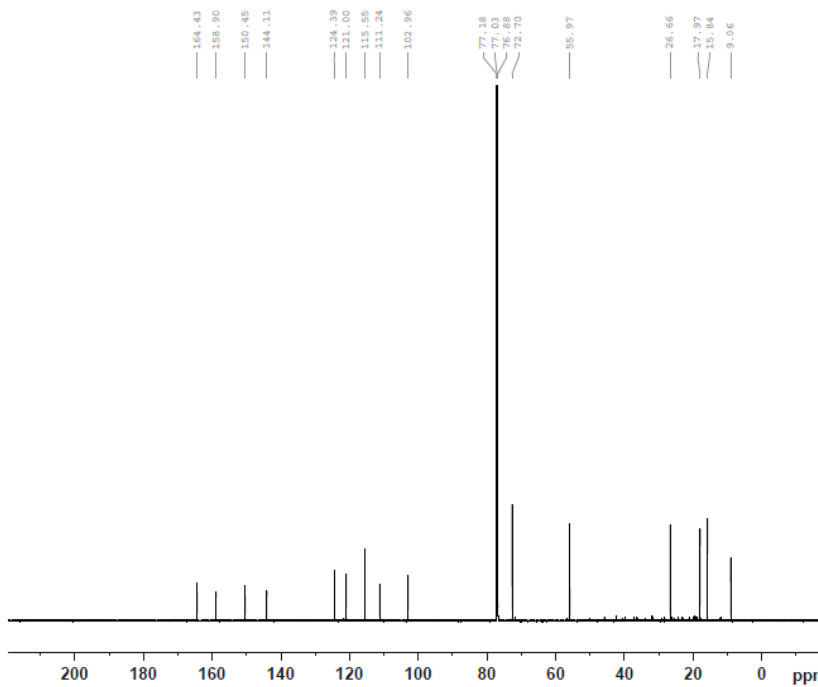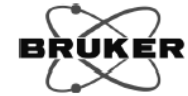

Current Data Parameters  
NAME: HOSSAM W-4 02-11-2015  
EXPNO: 101  
PROCNO: 1

F2 - Acquisition Parameters  
Date\_: 20111102  
Time: 11.02  
INSTRUM: spect  
PROBHD: 5 mm CPQCI 1H-  
PULPROG: zgpg30  
TD: 65536  
SOLVENT: CDCL3  
NS: 352  
DS: 4  
SWH: 81020.406 Hz  
FIDRES: 0.778810 Hz  
AQ: 0.6422528 sec  
RG: 186.93  
DW: 9.800 usec  
DE: 18.00 usec  
TE: 298.0 K  
D1: 2.00000000 sec  
D11: 0.03000000 sec  
TD0: 1

----- CHANNEL f1 -----  
SFO1: 213.7917636 MHz  
NUC1: 13C  
P1: 12.00 usec  
PLW1: 130.00000000 W

----- CHANNEL f2 -----  
SFO2: 850.1534006 MHz  
NUC2: 1H  
CPDPRG2: waltz16  
PCPD2: 80.00 usec  
PLW2: 13.80000019 W  
PLW12: 0.13800000 W  
PLW13: 0.08820000 W

F2 - Processing parameters  
SI: 32768  
SF: 213.7703875 MHz  
WDW: EM  
SSB: 0  
LB: 1.50 Hz  
GB: 0  
PC: 2.00

Supp. Fig 11. <sup>1</sup>H and <sup>13</sup>C NMR charts of compound 7
